# Supplementary material for: Transcriptome Analysis of Light-Regulated Monoterpenes Biosynthesis in Leaves of Mentha canadensis L
Source: MDPI journal article supplement (doi:10.3390/plants10050930), 2021-05-07
Supplement: s1 [file s1]

**Supplemental Table S1.** Summary of Illumina HiSeq4000 transcriptome sequencing and de novo assembly results

| Samples                    | CK-1       | CK2         | CK3       | Dark-1    | Dark2     | Dark3     | L1        | L2        | L3        |
|----------------------------|------------|-------------|-----------|-----------|-----------|-----------|-----------|-----------|-----------|
| Before Trimming            |            |             |           |           |           |           |           |           |           |
| Number of raw reads        | 48817260   | 7239548     | 51753350  | 73818268  | 67944906  | 54548164  | 58076350  | 66576074  | 81571672  |
| Number of clean reads      | 48726878   | 72260904    | 51668206  | 73668546  | 67815002  | 54425488  | 57945996  | 66442168  | 81427428  |
|                            | (99.81%)   | (99.81%)    | (99.84%)  | (99.80%)  | (99.81%)  | (99.78%)  | (99.78%)  | (99.80%)  | (99.82%)  |
| GC content (%)             | 51.49      | 51.42       | 51.56     | 51.56     | 51.16     | 51.23     | 51.10     | 50.55     | 51.07     |
| Q30 percentage (%)         | 93.32      | 92.66       | 93.25     | 93.32     | 93.49     | 92.86     | 92.55     | 93.47     | 93.41     |
| Clean base (bp)            | 7270597723 | 10772650770 | 771304730 | 109932279 | 101284763 | 813307924 | 862003762 | 993070975 | 121384532 |
|                            |            |             | 2         | 17        | 98        | 3         | 4         | 1         | 72        |
| After Assembly             |            |             |           |           |           |           |           |           |           |
| Total assembled bases (bp) | 72145391   |             |           |           |           |           |           |           |           |
| Total unigene numbers      | 95579      |             |           |           |           |           |           |           |           |
| GC percentage (%)          | 43.90      |             |           |           |           |           |           |           |           |
| N50 number                 | 1260       |             |           |           |           |           |           |           |           |
| Average length (bp)        | 754        |             |           |           |           |           |           |           |           |
