# Supplementary material for: Transcriptome Analysis of Light-Regulated Monoterpenes Biosynthesis in Leaves of Mentha canadensis L
Source: MDPI journal article supplement (doi:10.3390/plants10050930), 2021-05-07
Supplement: s1 [file s1]

Sequence data of mint (*Mentha Canadensis*) menthol biosynthesis pathway genes

>Seq1 [organism=Mentha canadensis] geranyl diphosphate synthase large subunit

ATGAGTGCTCTTGTAAATCCTGTGGCGAAATGGCCTCAGACGATCGGCATTAAAGATGTTACGGCGGCCGG  
AGGCGGAGATCCAGATCCACTCTTTCTCTCTCATCCACTTCGCACCGAAATGCCTTTCTCTCTACTTCTC  
ATCCCCCTCAAAGCTCCCGCCACTTTTTCCGTTTCTGCAGTTTATACCAAAGAAGGCAGCGAAATTAGGGA  
TAAAGATCCGGCGCCTTCGACTTCGCCGGCGTTTCGATTCGACGGATACATGCTCCGGAAGGCGAAATCCGT  
CAACAAGGCGTTGGAAGCGGCGGTGCAGATGAAGGAGCCGCTGAAGATCCACGAGTCCATGCGGTACTCC  
CTTCTCGCCGGCGGCAAGAGAGTGCCTCCGATGCTGTGCATCGCGGCCTGCGAGCTCGTCGGCGGCGACG  
AGTCCACGGCGATGCCGGCGGCTGCGCCGTCGAGATGATCCACACGATGTCGCTGATGCACGACGACCTC  
CCCTGCATGGACAACGACGACCTCCGCCGCGCAAGCCGACGAACCACATGGCTTTGCGCGAGAGCGTGG  
CGGTCCTCGCCGGCGACGCGCTCCTCTCCTTCGCGTTTCGAGCACGTGGCAGCGGCGACCAAGGCGCGCC  
GCCGGAGCGGATCGTGAGGGTCTCGGCGAGCTGGCGGTCTCGGTCGGGTCGGAGGGGCTGGTGCGGG  
GGCAGGTGGTGGACGCTGCTCGGAGGGGATGGCGGAGGTGCGGCTGGACCACCTCGAGTTCATCCACC  
ACCACAAGACGGCGGCGCTGCTGCAGGGGTGCGTGTTCTGGGGGCAATTTGGGCGGCGAAACGAGG  
AGGAGGTGGCGAAGTTGAGGAAATTCGCGAATTGCATCGGATTGCTGTTTCAGGTGGTGGACGATATCCTA  
GATGTGACGAAATCGTCCAAGGAATTGGGGAAGAAGGCGGGGAAGGATCTGGTGGCGGATAAAACCACA  
TATCCGAAGCTAATAGGCGTGGAGAAATCCATGGAATTCGCGGATCGGTTGAACAGGGAGGCGCAGGAGC  
AGCTCCTCCATTTTCATCCTCATAGGGCAGCTCCATTGATTGCTCTCGCCAATTATATTGCTTATAGGGACAATT  
GA

>Seq2 [organism=Mentha canadensis] geranyl diphosphate synthase small subunit

ATGGCCATTAATCTCTCCCATATCAACTCCAAAACATGTTTCCCTCTCAAAACAAGATCTGATCTCAGCCGTTT  
TTCTTCCGCGCGTTGTATGCCAACTGCCGCCGTGCCGCCTTCCCCACTATCGCCACCGCCGCCCAAAGTCA  
GCCGTACTGGGCGGCCATCGAGGCCGACATAGACAGATACCTGAAGAAATCCATCACAATAAGGCCGCCGG  
AGACAGTTTTCGGGCCCATGCACCACCTCACCTTCGCCGCCAGCCACCGCCGCCTCCGCCCTATGCTTGG  
CGGCGTGCGAGCTCGTCGGCGGCGACCGAAGCCAAGCCATGGCAGCCGCGGCGGCGATCCATCTCGTGCA  
CGCGGCAGCCTACGTCCACGAGCACCTCCCTCTAACCGACGGGTCGAGGCCCGTATCCAAGCCCGCAATCC  
AGCACAAGTACGGCCGAACGTCGAGCTCCTCACGGAGACGGGATTGTCCCGTTGCGGTTTGAGTTGCTG  
GCCGGGTCAGTGGAACCGGCCGAACAGACGACCGGATAGGATTCTGAGAGTTATAATAGAGATCAGTCG  
GGCCGGCGGGCGGAGGGAATGATAAGCGGGCTGCATAGGGAAGAAGAAATTGTTGATGGAAATACGAG  
TTTAGACTTCATTGAATATGTGTGCAAGAAAAAATACGGCGAGATGCATGCTTGGCGCGGCTTGTGGAGC  
CATATTGGGCGGCGCAGCCGAGGAGGAGATTGAGAAGCTGAGGAATTTGGGGCTTTATCAAGGAACTCTC  
AGAGGAATGATGGAAATGAAAAATTCTCATCAATTAATTGATGAGAATATAATTGGAAAAATTGAAAGAATTG  
GCTCTCGAGGAGTTGGGAGGCTTCACGGAAGAACGCTGAGCTGATGTCGAGCCTTGTAGCCGAGCCGA  
GCCTTTACGCGGCTTAG

>Seq3 [organism=Mentha canadensis] limonene-3-hydroxylase

ATGGAGCTCCAGATTCGTGCGGCGATTATAATCCTTGTAGTAACCTACACCATATCCCTCCTAATAATCAAGCA  
ATGGCGAAAACCGAAACCCCAAGAGAACCTGCCTCCGGGCCCCGCGAAGCTGCCGCTGATCGGGCACCTC  
CACCTCCTATGGGGGAAGCTGCCGCAGCACGCGCTGGCCAGCGTGGCGAAGCAGTACGGCCAGTGGCGC  
ACGTGCAGCTCGGCGAGGTGTTCTCCGTCTGCTCTCGTCCCGCGAGGCCACGAAGGAGGCGATGAAGCT  
GGTGGACCCGGCCTGCGCGGACCGGTTTCGAGAGCATCGGGACGAAGATCATGTGGTACGACAACGACGAC  
ATCATCTTCAGCCCCTACAGCGTGCCTGGCGCCAGATGCGCAAGATCTGCGTCTCCGAGCTCCTCAGCGCC  
CGCAACGTCCGCTCCTTCGGCTTCATCAGGCAGGACGAGGTGTCCCGCCTCCTCGGGCACCTCCGCTCCTC

GGCCGCGGCGGGGAGGCCGTGGACCTACGGAGCGGATAGCGACGCTGACGTGCTCCATCATCTGCAG  
GGCGGCGTTCGGGAGCGTGATCAGGGACCACGAGGAGCTGGTGGAGCTGGTGAAGGACGCCCTCAGCAT  
GGCGTCCGGGTTTCGAGCTCGCCGACATGTTCCCTCCTCCAAGCTCCTCAACTTGCTCTGCTGGAACAAGA  
GCAAGCTGTGGAGGATGCGCCGCCGCTCGACGCCATCCTCGAGGCCATCGTGGAGGAGCACAAGCTCAA  
GAAGAGCGGCGAGTTTGGCGGCGAGGACATTATTGACGTACTCTTTAGGATGCAGAAGGATAGCCAGATCA  
AAGTCCCCATCACCACCAACGCCATCAAAGCCTTCATCTTCGACACGTTCTCAGCGGGGACCGAGACATCAT  
CAACCACCACCCTGTGGGTGATGGCGGAGCTGATGAGGAATCCGGAGGTGATGGCGAAAGCGCAGGCGG  
AGGTGAGAGCGGCGCTGAAGGGGAAGACGGACTGGGACGTGGACGACGTGCAGGAGCTTAAGTACATG  
AAATCGGTGGTGAAGGAGACGATGAGGATGCACCCTCCGATCCCGTTGATCCCGAGATCATGCAGAGAAGA  
ATGCGAGGTCAACGGGTACACGATTCCGAATAAGGCCAGAATCATGATCAACGTGTGGTCCATGGGTAGGA  
ATCCTCTACTGGGAAAAACCGAGACCTTTTGCCCCGAAAGGTTTGACCAAGTCTCGAGGGATTTTCATG  
GGAAACGATTTTCGAGTTCATCCCGTTTGGAGCTGGAAGAAGAATCTGCCCCGTTTGAATTTTCGGGTTGGC  
AAATGTTGAGGTCCCATTGGCACAGCTTCTTTACCACTTCGACTGGAAGTTGGCGGAAGGAATGAAGCCTT  
CCGATATGGACATGTCTGAGGCAGAAGGCCCTACCGGAATAAGAAAGAACAATCTTCTACTCGTTCACAC  
CCTATCATCTTCCTCCTCATGA

>Seq4 [organism=Mentha canadensis] isopiperitenol dehydrogenase

ATGGCAATCGTGAAGAAGCTCGCAGGCAAGGTAGCCATCGTAACCGGCGGCCAGCGGCATCGGCGAGG  
TCACCGCCCGCCTTTCGCCGAGCGCGGCGCACGCGCGGTGGTGATCGCCGACATGCAGCCCGAGAAGGG  
CGGTACCGTGGCGGAATCCATCGGTGGCCGGCGGTGCAGCTACGTCCACTGCGACATCACCGACGAGGAA  
CAGGTCAAGTCCGTCTGTGGATTGGACCGCCGCCACTACGGCGGCGTCGACGTGATGTTCTGCAACGCCGG  
CACCGCCAGCGCCACCGCTCAGACCGTCTGGACCTGGACCTGGCGCAGTTCGACCGCGTCATGCGCGTCA  
ACGCCCCGCGCACGGCGGCGTGCCTGAAGCAGGCGGCGCGGAAGATGGTGGAGCTGGGGAGGGGAGG  
CGCTATCATCTGCACCGCAAGCGCGACGGCGAACCACGCCGGTCCCAACTTGACGGACTACATCATGTGCA  
AGCGCGGGGTGCTGGGGCTGGTGCAGTTCGGCGAGTTTGAGCTCGGGGTGCACGGGATTAGGGTTAACA  
GCGTGTGCGCGACGGCGCTGGCCACGCCGCTACCGCGACGATCGGGCTCCGGACGGCCGCCGATGTGGA  
GAGCTTCTATGGGCAGGTACGAGCTTGAAAGGGGTGGCGATCACGGCGGAGCACGTGGCCGAGGCGGT  
GGCGTTTCTGGCTTCGGATGAGGCGGCGTTCGTACCGGCCATGATTGGCTGTGGATGGTGGATTGCAGT  
GTTTACCATTCTGTGGCCGTGGCCAAGTGA

>Seq5 [organism=Mentha canadensis] isopiperitenone reductase

ATGGCAAATGTACAGAGGTATGCATTGGTGACGGGAGCAAATAAAGGAATCGGGTTCGAAATCTGCAGGCA  
GTTAGCAGAAAAAGGAATCATTGTGATTTTAACGGCAAGAAATGAAAAGAGAGGCATCGAAGCTCACCAA  
AGGCTGCTTAAGGAATTAACATTTCTAAAAATCATTTGGTTTTTCATCAACTCGATGTTACCGATCTGCTAG  
CATCGCCGCTGTTGCCGTCTTCATCAAATCTACATTCGGAAAACTCGATATTCTGGTGAATAATGCCGGAGTTA  
GCGGAGTAGAGATGGTTGGAGATGTTTCCGTGTTCAACGAGTATATTGAGGCTGACTTCAACGCCCTTCAA  
GCACTCGAAGCTGGTGCAAAGGAAGAGCCGCCATTTAAGCCCAAAGCAAATGGAGAAATGATCGAAAAAT  
TCGAAGGAGCCAAAGATTGCGTCGAAACAACTACTATGGTCCAAAGAGACTAACACAAGCCCTCATTCTCT  
TCTTACAACTATCTCCTTCGCCGAGAATCGTCAACGTCTCCTCCTCCTTCGGGAGTTTACTGCTTCTGTGGAAC  
GAATGGGCAAAGGGAGTGCTGGGGGACGAGGATAGGCTGACGGAAGAGAGAGTGGACGAAGTAGTGGA  
GGTTTTTCTCAAGGATATAAAGATGGTAAGCTCGAAGAAAATCAATGGCCTCCACATTTTTCGGCGGAAAG  
AGTCTCGAAGGCGGCGCTGAACGCGTACACTAAGATCGCGGCGAAGAAGTACCCGAGTTTCCGCATAAATG  
CAATATGCCCCGTTATGCGAAAACCGACATTACCTTCCATGCGGGACCTTTGAGTGTGTCGGAAGCTGCCC  
AGGTTCCGGTGAAGCTGGCTCTGCTGCCTGATGGTGGGCCCTCCGGGTGCTTCTCCCGCAGACAAAGCT

TTGGCTTTGTATTAA

>Seq6 [organism=Mentha canadensis] pulegone reductase

ATGGAAGTGGACATGGTGATGAACAAGCAAATTGTAACAACAACACGTCAACGGTTCCTTTAAAAGAATCC  
GACTTGTCGTTGAGAACTCCACGATCTGCATGGAGATCCCACATGGCTGCAACGGTGCCGTTTTGGTCAAG  
AACTTGTAAGTGTCCGTCAATCCTTATCTCATTCTTCGCATGGGAAAACGATATCCCACAGTTTGATTCCATC  
CTTCCTGGCTCTACTATTGTTAGCTATGGAGTGTCAAAAGTATTGGATTGACGCATCCGAGTTACGAGAAAAG  
GCGAACTGATTTGGGGGTCACAAGCTGGATGGGAGGAATATACCCTTATCCAAAATCCATATAATTTGTTTAA  
AATCCAAGACAAAGATGTGCCTTTATCCTACTATGTTGGAATTCTAGGAATGCCTGGGATGACAGCATATGCA  
GGGTTTTTTGAGATTTGCTCTCCGAAAAAAGGCGAAACTGTGTTTGTAACGGCTGCAGCAGGATCTGTGGG  
CCAGCTTGTTGGTCAGTTTGCAAAGATGTTGGGTGCTATGTTGTTGGAAGTGCAGGGAGCAAAGAGAAG  
GTTGATCTTTGAAGAACAAATTTGGGCTCGATGATGCATTTAATTATAAAGAAGAGAGTGATTATGATACTG  
CTTTGAAGAGGCACTTCCCCGAAGGAATTGATATATACTTCGATAATGTTGGAGGGAAGATGCTTGAAGCTG  
TGATCAACAACATGAGAGTCCACGGCCGCATCGCGGTATGTGGGATGGTCTCCAGTATAGCCTGAAGCAGC  
CCGAAGGCGTCCACAACCTTGCTTAAGCTCGTCCCAAAACAAATTCGATGCAAGGGTTTGTGCTTGTGATT  
ACTATCATCTCTACCCAAAGTTCTTGAAATGGTTCTGCCTTGATCAAGGGAGGAAAAAGTGATATACGTCGA  
AGACATATCTGAAGGCCTTGAGAGTGCAGCTAGTCTCTTGGGGGTGTATGTGGTCTGTAACATTGGCAA  
TCAGGTTGTTGCCGTTTCTCGCGAGTAA

>Seq7 [organism=Mentha canadensis] menthone:menthol reductase

ATGGCAGATACTTTTACACAGAGGTATGCTTTGATTACCGGTGCAAACAAAGGAATCGGGTTCGAGATATGC  
AGGCAGTTAGCTTCGAAAGGAATGAAGGTGATTTAGCTTCAAGAAACGAGAAGAGAGGCATCGAAGCTC  
GAGAAAGGCTACTTAAGGAATCGAGATCAATTTCTGATGACGATGTTGTTTTTCATCAACTTGATGTTGTTGA  
CCCTGCTAGCGCTGTTGCTGTTGCTCACTTCATCGAAACCAAATTCGGGAGGCTTGATATTCTGGTGAATAAT  
GCGGGATTTACTGGAGTAGCGATAGAGGGAGATATTTCAAGTGTATCAAGAGTGTATTGAGGCAAAACATTATT  
GCAGCTCAGAGTGGACAGGCACGTCCATTCCATCCCAAATCAAATGGTAGGCTTATTGAAACATTGGAGGG  
TTCAAAAGAGTGTATAGAAACAACTACTATGGCACAAAAAGAATAACAGAAACCCTAATTCCTCTCCTGCA  
AAAATCTGATTCGCCAACAATTGTCAATGTCTCATCCACCTTCTCCACTTTACTGCTCCAGCCTAATGAATGGG  
CAAAAGGAGTATTTAGCAGTGAAGACACCAGTCTGAATGAAGAGAAGGTGGAGGAAGTTTTGCATGAATT  
TATGAAGGATTTTCATCGATGGTAACTGCAACAAAACCACTGGCCTCCTAACCTTGACGCTACAAAGTGTC  
GAAAGCTGCTGTTAATGCATATACTCGGATCATAGCGCGAAAGTACCCGAGTTTCTGCATAAATTCAGTGTGT  
CCTGGTTTTGTTAGAACAGATATTTGCTACAATCTTGAGTACTAAGTGAAGCTGAAGGTGCTGAAGCTCCG  
GTGAAGCTGGCTTTGTTGCCAATGGCGGGCCCTCGGGCTCCTTCTCTCTCGAGAGGAAGCCTTGTCCTT  
GTACTAA

>Seq8 [organism=Mentha canadensis] menthone:neomenthol reductase

ATGGGAGATGAAGAAGTCGTCCACCACGCTACAACAAAGAGGTATGCACTGGTTACCGGTGCGAACAGAG  
GAATCGGGTTCGAAATCTGCAGGCAGTTAGCTTCAAAGGAATCGTGGTGATTTTAGCTTCAAGAAACGAG  
AAGAGAGGTATCGAAGCTCGAGAAAGGCTGATTAAGGAATTGGGATCAGAGTTTGAAATTATGTGATTTT  
TCATCAACTCGATGTTGCTGATCCTGCTAGCCTTGCCGCTCTGTGCACTTCATCAAAACCAAATTTGGAAGC  
CTTGATATTCTGGTGAATAATGCAGGAATCAACGGAGTAGAGGTGGAGGGAGATGTTTCGGTTTATACAGA  
GTATGTTGAGGCAGAATTGAAGACGATGCTTGAAGCTGGTCATGGTGGAGTACAGGGAGAGGCATTTTCATC  
CTCAAGGAAATGGAAGGTTTGTGAGACATTGGAGAGTGCAGAAAGAGTGCATAGAAACAACTACTATGGC  
GCAAAAAGAATAACACAAGCCCTCATTCTCTTTTGCAACTCTCTCATTCTCCAAGAATTGTCAATGTCTCCTC

TTCATTAGGGAGTTTAGTGCTTCAGCCTAATGAATGGGCAAAAGGAGTGTTTAGCAGTGAAGACAACAGCC  
TCACAGAGGAGAAAGTGGAGGAAGTTTTGCATGAATTTCTCAAGGATTTCAAAGAGGCTAAACTGCAAGA  
AAACCACTGGCCTCATCACTTTGCAGCCTACAAAGTGTCGAAAGCAGCTATGAACGCGTATACTCGGATTATA  
GCCAAAAAATACCCGAGTTTCTGCATAAATCCGTGTGTCCTGGTTTTACTAGAACTGAGATTTCTACGGTC  
TTGGGCAATTTAGTGTAGCTGAATCTACTGAAGCTCTGGTGAAGCTGGCTTTGCTGCCCCACGGAGGGCCG  
TCCGGATGCTTCTTCACTCGAGACGAAGCGTTCTGCTTGATTAA
