# Supplementary material for: Transcriptome Analysis of Light-Regulated Monoterpenes Biosynthesis in Leaves of Mentha canadensis L
Source: MDPI journal article supplement (doi:10.3390/plants10050930), 2021-05-07
Supplement: s1 [file s1]

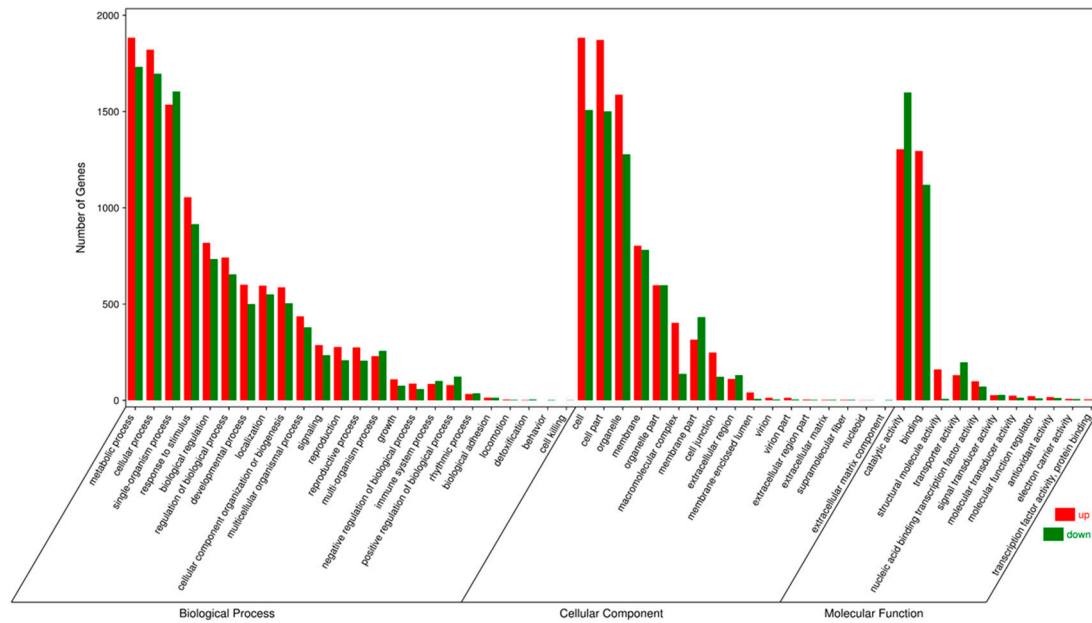

**Supplementary Figure S5 GO terms of DEGs among control light condition vs darkness**

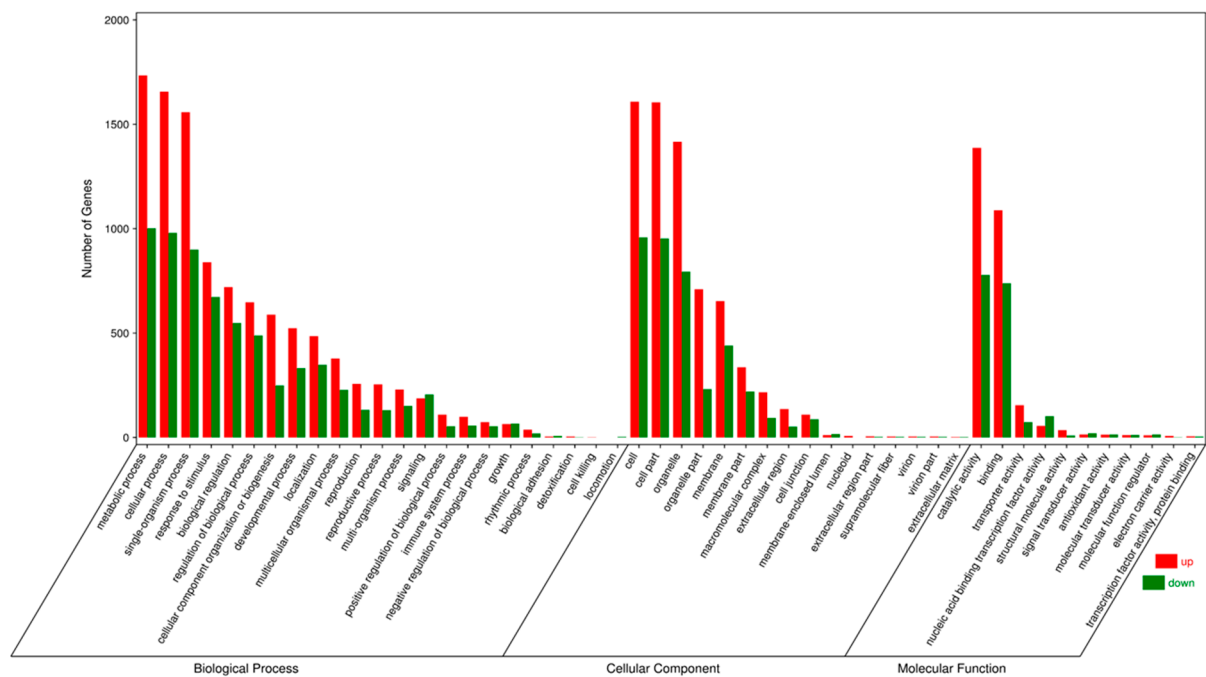

**Supplementary Figure S6 GO terms of DEGs among darkness condition vs exposure to light**
