# Supplementary material for: Transcriptome Analysis of Light-Regulated Monoterpenes Biosynthesis in Leaves of Mentha canadensis L
Source: MDPI journal article supplement (doi:10.3390/plants10050930), 2021-05-07
Supplement: s1 [file s1]

**Supplemental Table S2.** Functional annotations of unigene Statistics from transcriptoms of *Mentha canadensis*

| Annotation database                | Number of unigenes | Percentage (%) |
|------------------------------------|--------------------|----------------|
| Nr                                 | 54084              | 56.58          |
| Swissprot                          | 32399              | 33.89          |
| KOG                                | 26218              | 27.43          |
| KEGG                               | 46665              | 23.82          |
| Annotated in at least one database | 61820              | 48.82          |
| Total unigenes                     | 95579              | 100            |
