# Supplementary material for: Transcriptome Analysis of Light-Regulated Monoterpenes Biosynthesis in Leaves of Mentha canadensis L
Source: MDPI journal article supplement (doi:10.3390/plants10050930), 2021-05-07
Supplement: s1 [file s1]

**Supplementary Table S3. Sequences of primers used for qRT-PCR**

| Unigenes                | Forward primers               | Reverse primers              |
|-------------------------|-------------------------------|------------------------------|
| Unigene0016246 (COP1)   | 5'- ATGCGTTTCTGACTTCGTG -3'   | 5'- AAGGAGTGGCAGTTTTAGC -3'  |
| Unigene0003571 (PHOT)   | 5'- TTGATTGGTGGGCTCTTGG -3'   | 5'- GCCTTGCTGGGAGTGTTAC -3'  |
| Unigene0009588 (WRKY40) | 5'-GATCTAATAATGCCCTCCCT-3'    | 5'-TCACGCTCTTCACCACCT-3'     |
| Unigene0055177 (ERF1)   | 5'- TGGCGGACAATTAGTGGTG -3'   | 5'- AAGCAAGTGGGAAAATGGG -3'  |
| Unigene0018692(MsMYB)   | 5'- GTATGACGGAGGACTTGAAC -3'  | 5'- TCCCAAATCCACGAAAGCG -3'  |
| Unigene0003114 (MYC1)   | 5'- GAAGAGGGGAAGGAAGCC -3'    | 5'- TGCAGATACGTTGGGGA -3'    |
| Unigene0000987 (CPRF3)  | 5'- GGGTGACATCATGAAGGC-3'     | 5'- CAAGATACTCTGCTCTGCG-3'   |
| Unigene0003421 (RAV1)   | 5'- CTCCAAACAGCCTCACCAT -3'   | 5'- CGCCGGAAGTTTGAGAGA -3'   |
| Unigene0045757(GPPS-l)  | 5'-TACATCCACCACCACAAGACGG-3'  | 5'-TTCCTGAGCCTCGCCACCT-3'    |
| Unigene0038587 (GPPS-s) | 5'-CGTCCACGAACACCTCCCT-3'     | 5'-CCGGCCAGCAACTCAAAC-3'     |
| Unigene0018537 (LS)     | 5'-CGACCAACTTCCCGATTA-3'      | 5'-AACCACCGTGCCTCTACC-3'     |
| Unigene0052571 (L3OH)   | 5'-CCCGAAAGGTTTGACGATGT-3'    | 5'-CAGATTCTTCTCCCGCTCC-3'    |
| Unigene0033747 (iPD)    | 5'-GCGACATCACCGACGAGGAA-3'    | 5'-GCCCCGCTTGCAGAACAT-3'     |
| Unigene0033916 (iPR)    | 5'-GTTGGAGATGTTTCCGTGTT-3'    | 5'-TGGACCATAGTAGTTTGTTTCG-3' |
| Unigene0030907 (MFS)    | 5'-AGAGGGTCCAGTCGTTCCG-3'     | 5'-ACTACGCCGTTTCGTCAGC-3'    |
| Unigene0047772 (PR)     | 5'-GCGTCCACAACCTTGCTTA-3'     | 5'-TACGACCGACATACACCC-3'     |
| Unigene0041050 (MR)     | 5'-ACTGGAGTAGCGATAGAGGG-3'    | 5'-GATTTGGGATGGAATGGAC-3'    |
| Actin                   | 5'-CCAGGAATTGCTGATAGGATGAG-3' | 5'-GCGCCACCACCTTAATCTTC-3'   |
