# Supplementary material for: Transcriptome Analysis of Light-Regulated Monoterpenes Biosynthesis in Leaves of Mentha canadensis L
Source: MDPI journal article supplement (doi:10.3390/plants10050930), 2021-05-07
Supplement: s1 [file s1]

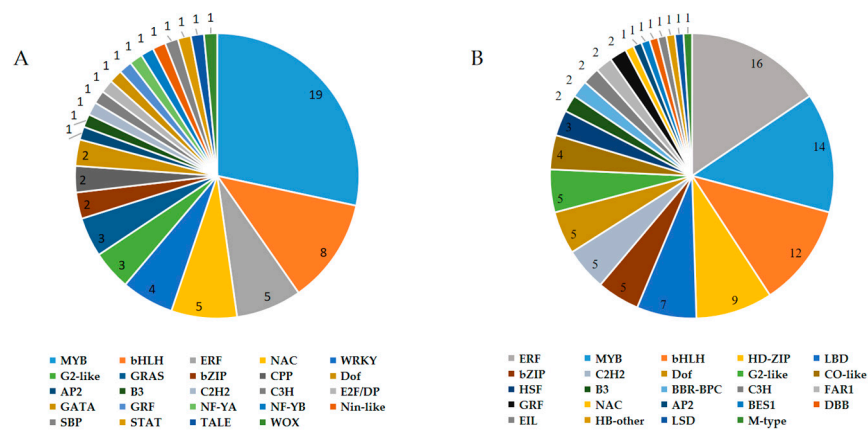

Supplementary Figure S4 Distribution of transcription factor (TF) families. A Distribution of 67 TFs have the similar expression pattern with terpenoids synthesis pathway genes. B Distribution of 67 TFs have the opposite expression pattern with terpenoids synthesis pathway genes which were down-regulated by darkness and up-regulated after recovery light.
