# Supplementary figures and images for: Transcriptome Analysis of Light-Regulated Monoterpenes Biosynthesis in Leaves of Mentha canadensis L
Source: MDPI journal article supplement (doi:10.3390/plants10050930), 2021-05-07

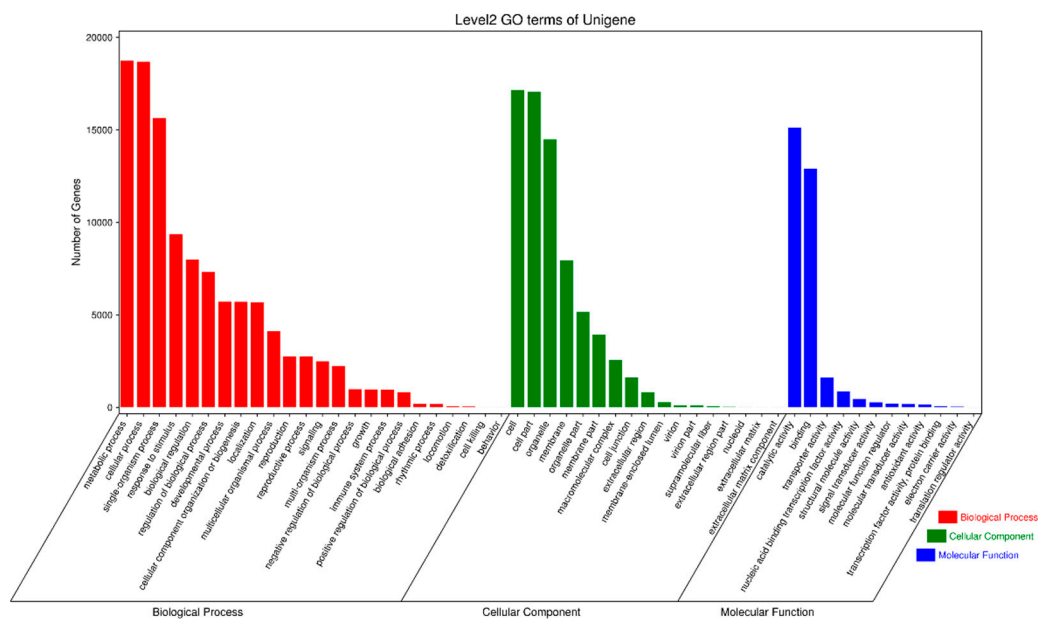

Supplementary Figure S1 GO functional classification of assembled unigenes

Supplement: s1 [file s1]

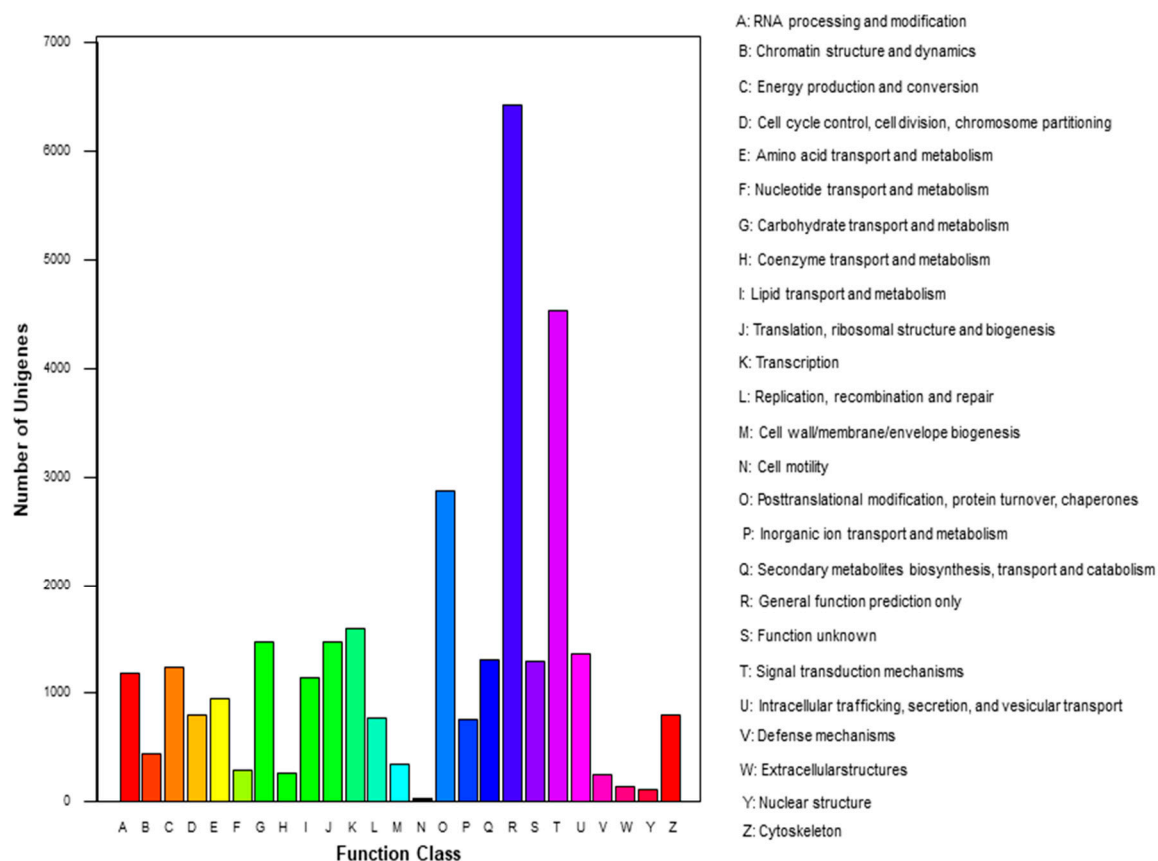

Supplementary Figure S2 KOG functional classification of assembled unigenes

Supplement: s1 [file s1]

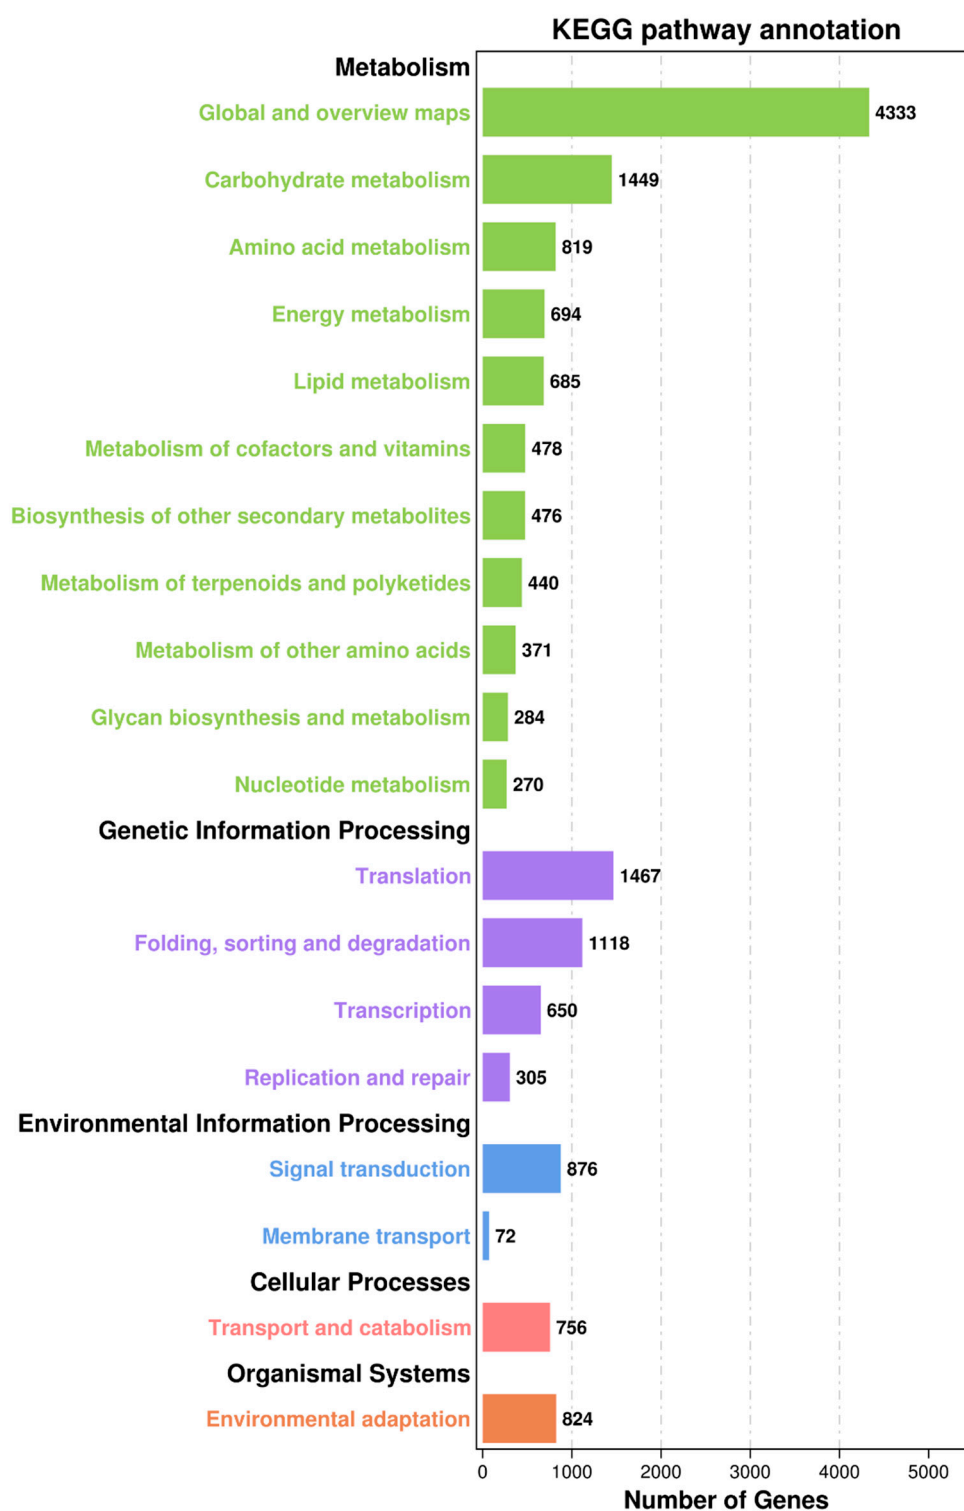

**Supplementary Figure S3 KEGG pathway annotation of assembled unigenes.**

Supplement: s1 [file s1]
